# Supplementary material for: Superior strength and highly thermoconductive cellulose/ boron nitride film by stretch-induced alignment
Source: Royal Society of Chemistry journal article supplement (doi:10.1039/d1ta00143d), 2021-01-01
Supplement: d1ta00143d1.pdf [file d1ta00143d1.pdf]

## Supplementary Materials

### **Superior Strength and Highly Thermoconductive Cellulose/ Boron Nitride Film by Stretch-induced Alignment**

Hu Tu,<sup>1,3,#</sup> Kang Xie,<sup>2,#</sup> Xinghuan Lin,<sup>1</sup> Ruquan Zhang,<sup>3</sup> Feng Chen,<sup>2</sup> Qiang Fu,<sup>2,\*</sup> Bo Duan,<sup>1,\*</sup> Lina Zhang<sup>1</sup>

<sup>1</sup> College of Chemistry and Molecular Sciences, Hubei Engineering Center of Natural Polymer-based Medical Materials and Key Laboratory of Biomedical Polymers of Ministry of Education, Wuhan University, Wuhan 430072, China

<sup>2</sup> College of Polymer Science and Engineering, Sichuan University, Chengdu 610065, China

<sup>3</sup> State Key Laboratory of New Textile Materials and Advanced Processing Technologies, Wuhan Textile University, Wuhan 430200, China

# Hu Tu and Kang Xie contributed equally to this work.

Correspondence to:

[qiangfu@scu.edu.cn](mailto:qiangfu@scu.edu.cn) (Q. Fu), [bo\\_duan@whu.edu.cn](mailto:bo_duan@whu.edu.cn) (B. Duan)

Table S1 the components of different cellulose/BN-OH solution

| Solution             | BNNS-OH<br>percent (%) | LiOH/urea<br>solvent (g) | Cellulose<br>(g) | BNNS-<br>OH (g) |
|----------------------|------------------------|--------------------------|------------------|-----------------|
| cellulose            | 0                      | 100                      | 5.5              | 0               |
| cellulose/10%BNNS-OH | 10                     | 100                      | 5.5              | 0.55            |
| cellulose/30%BNNS-OH | 30                     | 100                      | 5.5              | 1.65            |
| cellulose/50%BNNS-OH | 50                     | 100                      | 5.5              | 2.75            |
| cellulose/70%BNNS-OH | 70                     | 100                      | 5.5              | 3.85            |

Table S2 The atomic percent of cellulose/BNNS-OH films with various ratios of BNNS-OH from EDS results.

| Elements (%)<br>Samples | C     | O     | B     | N     |
|-------------------------|-------|-------|-------|-------|
| cellulose-1.0           | 80.02 | 19.98 | 0     | 0     |
| 10%BN-1.0               | 67.31 | 13.29 | 11.22 | 8.19  |
| 30%BN-1.0               | 55.38 | 15.99 | 15.51 | 13.12 |
| 50%BN-1.0               | 49.58 | 8.63  | 21.90 | 19.90 |
| 70%BN-1.0               | 44.48 | 6.93  | 27.44 | 21.14 |

Table S3 The comparison of (002) and (100) peaks intensities with 50%BN-1.0, 50%BN-2.0 and 50%BN-3.0 from the XRD results.

| Samples               | 50%BN-1.0 | 50%BN-2.0 | 50%BN-3.0 |
|-----------------------|-----------|-----------|-----------|
| $I_{(002)}$           | 76865     | 82155     | 108905    |
| $I_{(100)}$           | 1030      | 920       | 1100      |
| $I_{(002)}/I_{(100)}$ | 74.6      | 89.3      | 99.0      |

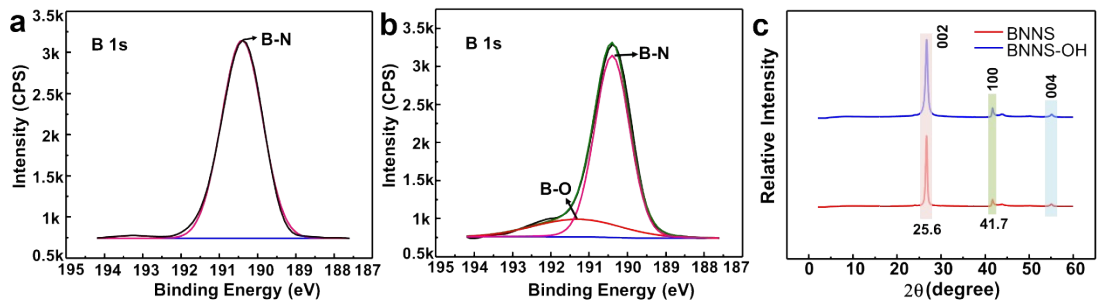

Fig. S1 XPS B1s spectrum of BNNS (a) and BNNS-OH (b). The XRD patterns of BNNS and BNNS-OH (c).

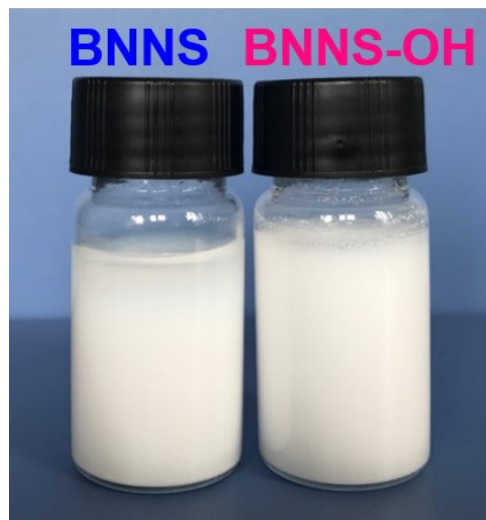

Fig. S2 BNNS and BNNS-OH dispersed in alkali/urea solution for 24h.

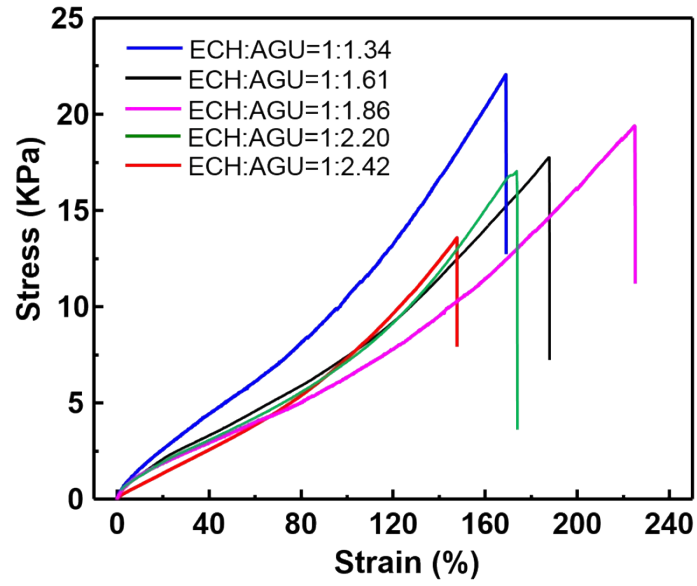

Fig. S3 Tensile stress–strain curves of chemical crosslinked hydrogels with differential dosage of chemical crosslinker (ECH).

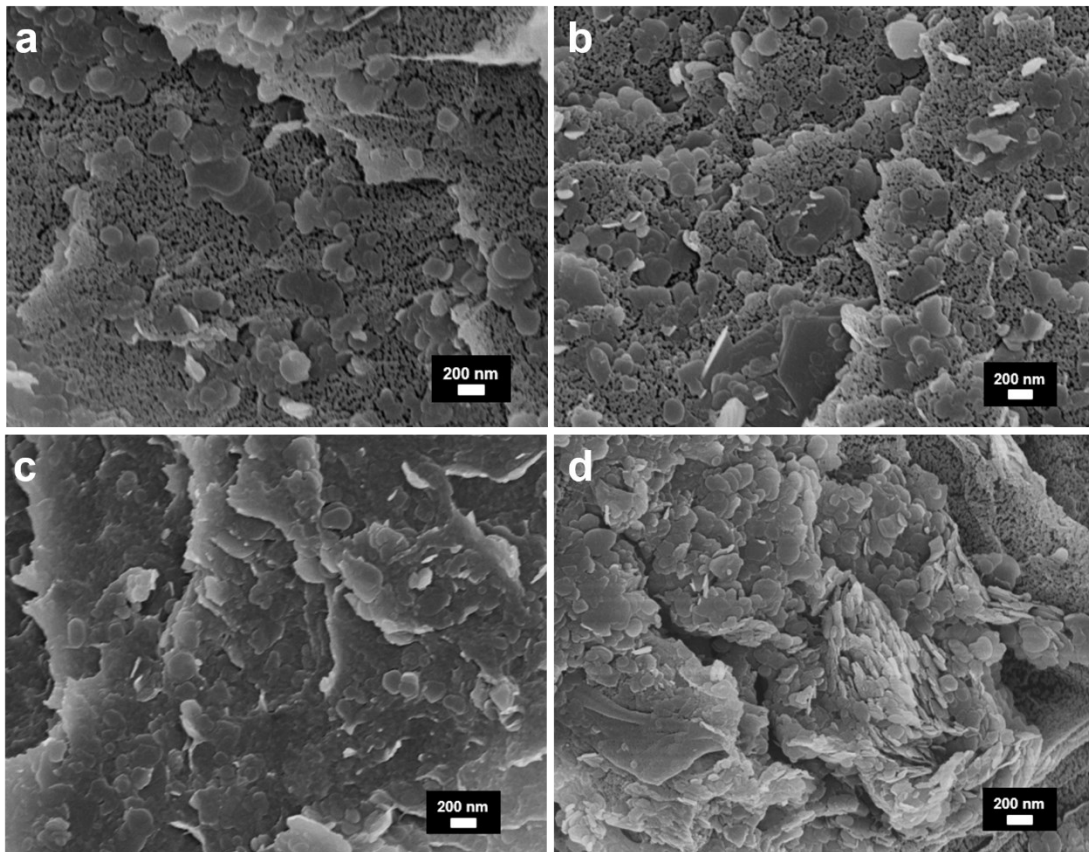

Fig. S4 SEM images of 10%BN-1.0 (a), 30%BN-1.0 (b), 50%BN-1.0 (c) and 70%BN-1.0 (d).

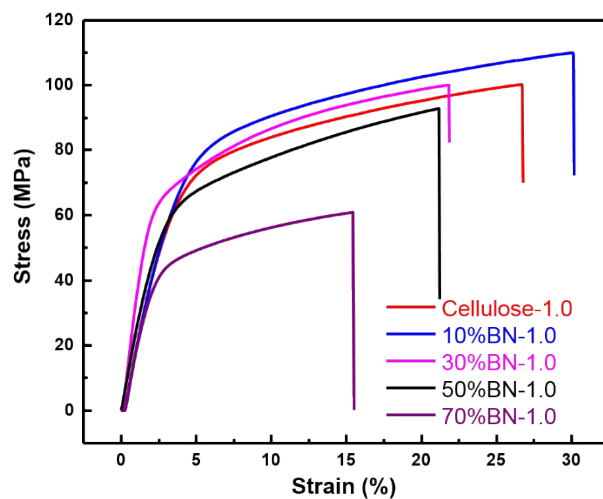

Fig. S5 Stress–strain curves of the dual-cross-linked cellulose films loaded with various ratios of BNNS-OH.

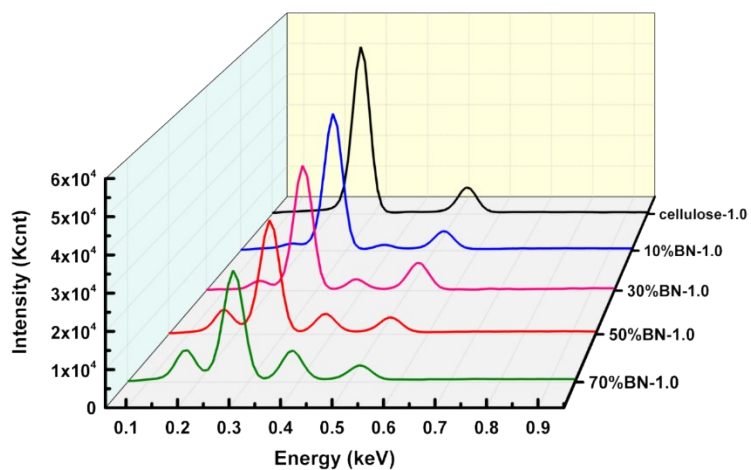

Fig. S6 EDS spectra of cellulose/BNNS-OH films with various ratios of BNNS-OH.

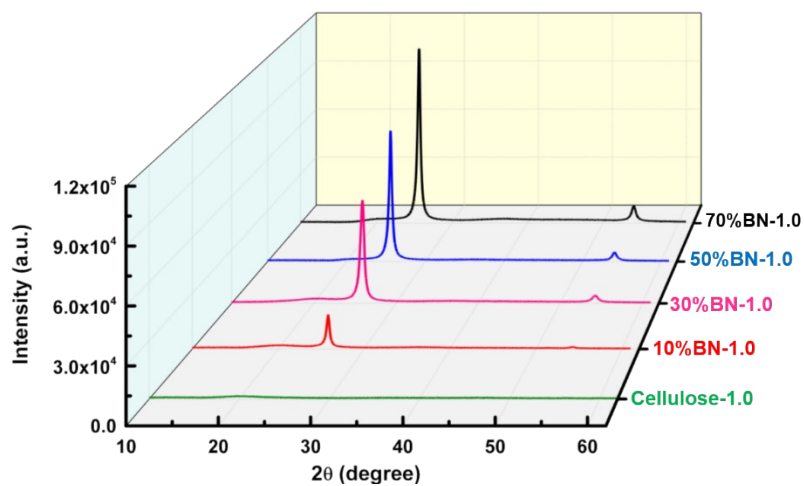

Fig. S7 The XRD patterns of cellulose/BNNS-OH films with various ratios of BN-OH.

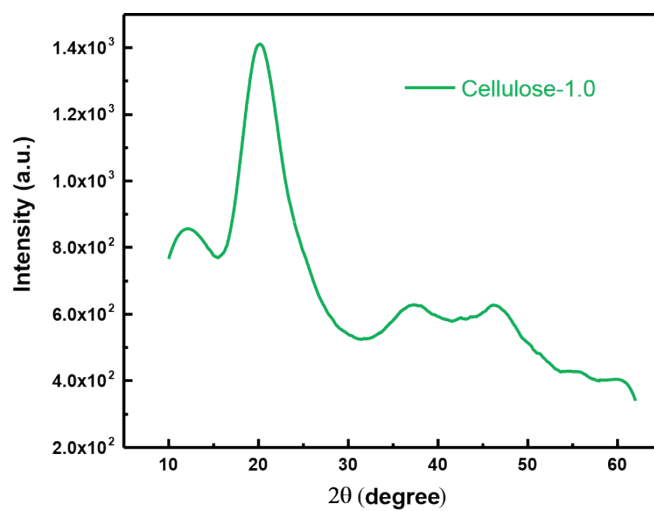

Fig. S8 The XRD patterns of cellulose-1.0.



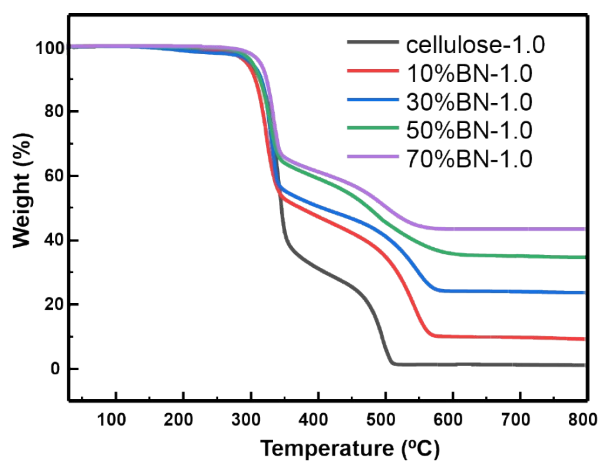

Fig. S9 The TGA results of cellulose/BNNS-OH films with various ratios of BNNS-OH.

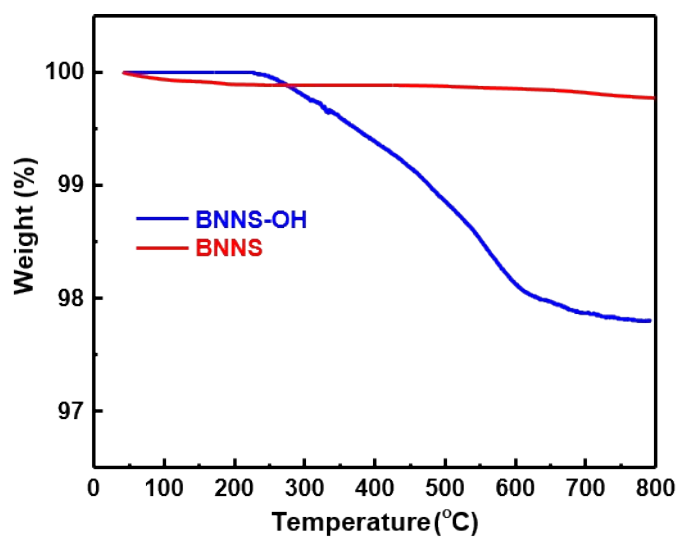

Fig. S10 The TGA results of BNNS and BNNS-OH.

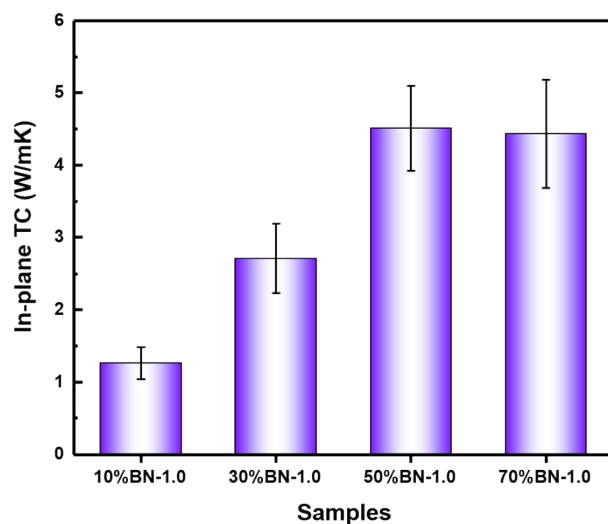

Figur. S11 The in-plane thermal conductivities (TC) of the cellulose/BNNS-OH films with different BNNS-OH content.

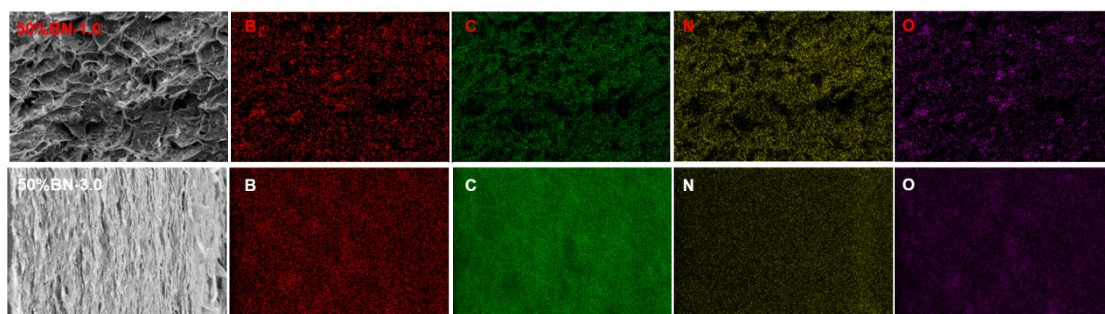

Fig. S12 The EDS mapping patterns of 50%BN-1.0 and 50%BN-3.0.

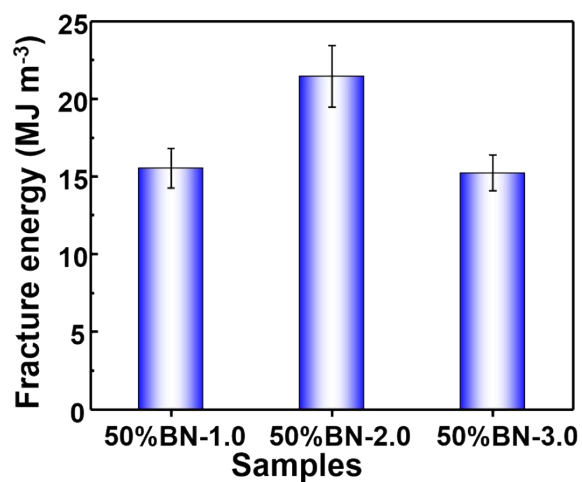

Fig. S13 The fracture energy of 50%BN-1.0, 50%BN-2.0 and 50%BN-3.0

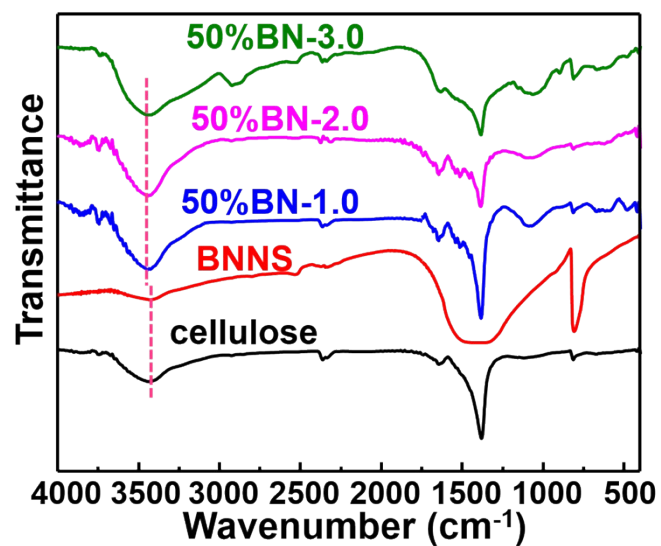

Fig. S14 FT-IR spectra of various samples.

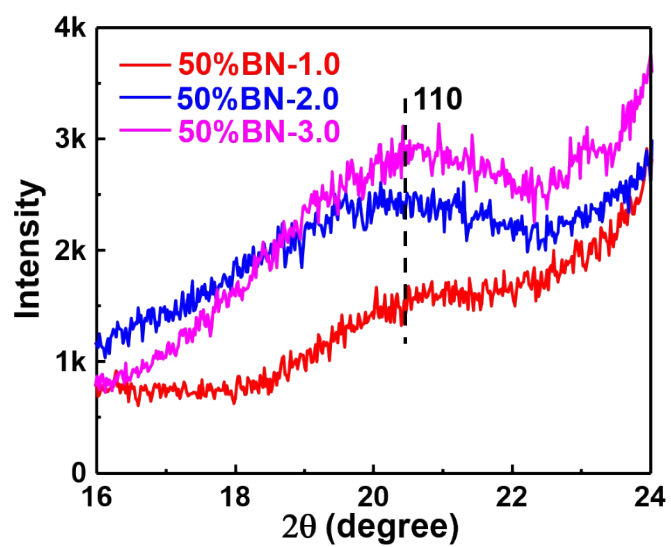

Fig. S15 The XRD patterns of 50%BN-1.0, 50%BN-2.0 and 50%BN-3.0 from Fig. 3f.

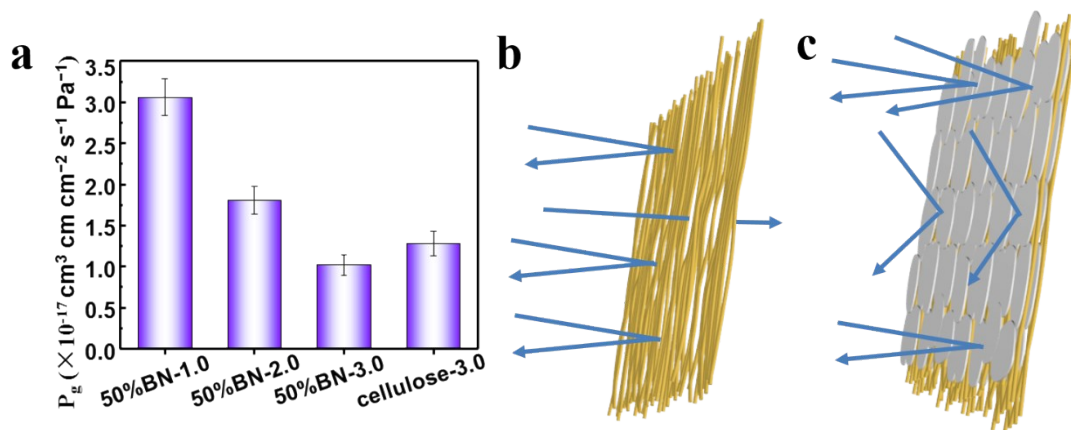

Fig. S16 The oxygen permeability of various samples (a). The schematic diagram of the gas barrier properties of cellulose-3.0 (b) and 50%BN-3.0 (c).

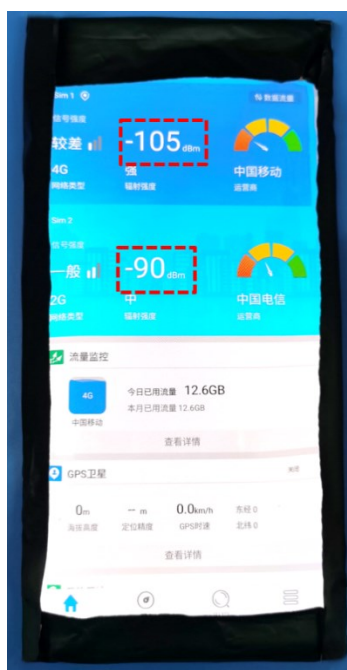

Fig. S17 The photographs of the signal intensities of the mobile phone coated with the commercial graphene film.
